# Supplementary material for: Context and Mutation in Gymnosperm Chloroplast DNA
Source: MDPI journal article supplement (doi:10.3390/genes14071492), 2023-07-22
Supplement: s1 [file s1]

Table S1: List of taxa triplets

Thuja occidentalis, Cathaya argyrophylla, Pinus contorta<sup>1</sup>  
Juniperus monosperma, Abies religiosa, Keteleeria davidiana  
Agathis dammara, Picea abies, Cedrus deodara  
Taxodium distichum, Pseudolarix amabilis, Nothotsuga longibracteata  
Sequoia sempervirens, Pseudotsuga sinensis, Larix decidua  
Cathaya argyrophylla, Taxodium distichum, Glyptostrobus pensilis  
Wollemia nobilis, Chamaecyparis formosensis, Chamaecyparis hodginsii  
Cathaya argyrophylla, Sequoia sempervirens, Metasequoia glyptostroides  
Pseudotsuga sinensis, Thuja plicata, Thuja occidentalis  
Taxodium distichum, Juniperus monosperma, Cupressus torulosa  
Pinus contorta, Hesperocyparis benthamii, Callitropsis nookatensis  
Sequoia sempervirens, Wollemia nobilis, Agathis dammara  
Metasequoia glyptostroides, Araucaria bidwillii, Araucaria araucana  
Agathis dammara, Ephedra sinica, Ephedra foeminea  
Sequoia sempervirens, Juniperus monosperma, Chamaecyparis hodginsii  
Pinus contorta, Wollemia nobilis, Araucaria bidwillii  
Taxodium distichum, Hesperocyparis benthamii, Callitropsis nookatensis

1. Triplets listed as Outgroup, Ingroup 1, Ingroup 2
